# Supplementary material
Source: Royal Society of Chemistry journal article supplement (doi:10.1039/d6ay00720a)
Supplement: d6ay00720a1.xlsx [file d6ay00720a1.xlsx]

## Sheet: Sheet1
In-solution digestion	SiO2@ Fe3O4-nIMER	SiO2@Fe3O4-nIMER
KV37_HUMAN	KV37_HUMAN	KV37_HUMAN
LV469_HUMAN	LV469_HUMAN	LV469_HUMAN
LV861_HUMAN	LV861_HUMAN	LV861_HUMAN
LV746_HUMAN	LV746_HUMAN	LV460_HUMAN
LV233_HUMAN	LV233_HUMAN	LV746_HUMAN
LV316_HUMAN	LV218_HUMAN	LV233_HUMAN
LV310_HUMAN	LV316_HUMAN	LV218_HUMAN
LV39_HUMAN	LV310_HUMAN	LV316_HUMAN
KV228_HUMAN;KVD28_HUMAN	LV39_HUMAN	LV312_HUMAN
HV404_HUMAN	KV228_HUMAN;KVD28_HUMAN	LV310_HUMAN
KVD24_HUMAN;KV224_HUMAN	HV364_HUMAN	LV39_HUMAN
KVD29_HUMAN	HV404_HUMAN	KV228_HUMAN;KVD28_HUMAN
KV127_HUMAN	KVD24_HUMAN;KV224_HUMAN	HV364_HUMAN
KVD30_HUMAN	KVD29_HUMAN	HV404_HUMAN
KV137_HUMAN;KVD37_HUMAN	KV127_HUMAN	KVD24_HUMAN;KV224_HUMAN
A0A075B6W8_HUMAN	KV137_HUMAN;KVD37_HUMAN	KVD29_HUMAN
A0A075B7B8_HUMAN	A0A075B6W8_HUMAN	KV127_HUMAN
A0A075B7D0_HUMAN;A0AAG2TVE0_HUMAN	A0A075B7B6_HUMAN	KVD30_HUMAN
A0A075B7E8_HUMAN	A0A075B7B8_HUMAN	KV137_HUMAN;KVD37_HUMAN
LV545_HUMAN	A0A075B7D0_HUMAN;A0AAG2TVE0_HUMAN	A0A075B6W8_HUMAN
KVD15_HUMAN	A0A075B7D8_HUMAN	A0A075B7B6_HUMAN
KVD08_HUMAN	A0A075B7E8_HUMAN	A0A075B7B8_HUMAN
KVD11_HUMAN;KV311_HUMAN	LV545_HUMAN	A0A075B7D0_HUMAN;A0AAG2TVE0_HUMAN
HV349_HUMAN	KVD15_HUMAN	A0A075B7D8_HUMAN
KVD21_HUMAN	KVD08_HUMAN	A0A075B7E8_HUMAN
A0A0A0MT69_HUMAN	KV240_HUMAN;KVD40_HUMAN	A0A075B7F0_HUMAN
KJ01_HUMAN	A0A087WYE8_HUMAN;A0A0B4J2B8_HUMAN	LV545_HUMAN
LV136_HUMAN	KVD11_HUMAN;KV311_HUMAN	KVD15_HUMAN
HV601_HUMAN	HV145_HUMAN	KVD08_HUMAN
HV315_HUMAN	HV349_HUMAN	KV240_HUMAN;KVD40_HUMAN
HV226_HUMAN	KVD21_HUMAN	A0A087WYE8_HUMAN;A0A0B4J2B8_HUMAN
HV374_HUMAN	A0A0A0MT69_HUMAN	KVD11_HUMAN;KV311_HUMAN
HV343_HUMAN	KJ01_HUMAN	HV145_HUMAN
LV949_HUMAN	LV136_HUMAN	HV349_HUMAN
HV372_HUMAN	HV601_HUMAN	KVD21_HUMAN
KVD13_HUMAN;KV113_HUMAN	HV315_HUMAN	A0A0A0MT69_HUMAN
KV621_HUMAN	HV226_HUMAN	KJ01_HUMAN
KVD20_HUMAN	HV373_HUMAN	LV136_HUMAN
HV316_HUMAN	HV374_HUMAN	HV601_HUMAN
HV118_HUMAN	HV343_HUMAN	HV315_HUMAN
HV320_HUMAN	LV949_HUMAN	HV226_HUMAN
HV335_HUMAN	HV372_HUMAN	HV373_HUMAN
HV338_HUMAN	KVD13_HUMAN;KV113_HUMAN	HV374_HUMAN
HV551_HUMAN	KV621_HUMAN	HV343_HUMAN
HV70D_HUMAN	KVD20_HUMAN	LV949_HUMAN
KV108_HUMAN	HV103_HUMAN	HV372_HUMAN
KV112_HUMAN;KVD12_HUMAN	HV316_HUMAN	KVD13_HUMAN;KV113_HUMAN
A0A0G2JRQ6_HUMAN	HV118_HUMAN	KV621_HUMAN
A0A0J9YWU9_HUMAN	HV320_HUMAN	KVD20_HUMAN
HV64D_HUMAN	HV124_HUMAN	HV103_HUMAN
HV5X1_HUMAN	HV428_HUMAN	HV316_HUMAN
A0A0J9YY99_HUMAN	HV335_HUMAN	HV118_HUMAN
A0A3Q1LSF0_BOVIN	HV338_HUMAN	HV320_HUMAN
A0AAG2SVT6_HUMAN	HV551_HUMAN	HV124_HUMAN
A0AAG2SXZ4_HUMAN	HV70D_HUMAN	HV428_HUMAN
IGLC7_HUMAN	KV108_HUMAN	HV335_HUMAN
TM212_HUMAN	KV112_HUMAN;KVD12_HUMAN	HV338_HUMAN
IGLL5_HUMAN	A0A0G2JRQ6_HUMAN	HV551_HUMAN
E1BNR0_BOVIN	LV539_HUMAN	HV366_HUMAN;HV353_HUMAN
F1N5M2_BOVIN	A0A0J9YWU9_HUMAN	HV70D_HUMAN
BiognosysIRT	HV64D_HUMAN	KV108_HUMAN
MASP2_HUMAN	HV5X1_HUMAN	KV112_HUMAN;KVD12_HUMAN
QSOX1_HUMAN	A0A0J9YY99_HUMAN	A0A0G2JRQ6_HUMAN
P3C2A_HUMAN	A0A3Q1LSF0_BOVIN	LV539_HUMAN
NCHL1_HUMAN	A0A3Q1M3L6_BOVIN	HV741_HUMAN
NRP1_HUMAN	A0A3Q1NGH3_BOVIN	A0A0J9YWU9_HUMAN
APOL1_HUMAN	A0AAG2SVT6_HUMAN	HV64D_HUMAN
CD5L_HUMAN	A0AAG2SXZ4_HUMAN	HV5X1_HUMAN
H2B1K_HUMAN;H2BFS_HUMAN;H2B1D_HUMAN;H2B1C_HUMAN;H2B2F_HUMAN;H2B1H_HUMAN;H2B1N_HUMAN;H2B1M_HUMAN;H2B1L_HUMAN	A0AAG2UXZ5_HUMAN;COIA1_HUMAN	A0A0J9YY99_HUMAN
FCG3B_HUMAN	IGLC7_HUMAN	A0A3Q1LSF0_BOVIN
ICOSL_HUMAN	SPA35_BOVIN	A0A3Q1MJB2_BOVIN
FCN3_HUMAN	SPA37_BOVIN	A0A3Q1NGH3_BOVIN
ATRN_HUMAN	TM212_HUMAN	A0AAG2SVT6_HUMAN
LC7L3_HUMAN	CC169_HUMAN;NIF3L_HUMAN	A0AAG2SXZ4_HUMAN
APOM_HUMAN	MAGBH_HUMAN	A0AAG2UXZ5_HUMAN;COIA1_HUMAN
ABCA1_HUMAN	IGLL5_HUMAN	IGLC7_HUMAN
NDST3_HUMAN;NDST4_HUMAN	E1BNR0_BOVIN	SPA35_BOVIN
GSHR_HUMAN	F1MVK1_BOVIN	SPA37_BOVIN
CERU_HUMAN	F1N076_BOVIN	IGLL5_HUMAN
F13A_HUMAN	F1N5M2_BOVIN	E1BNR0_BOVIN
LALBA_BOVIN	F6R4P6_BOVIN	F1MVK1_BOVIN
THRB_HUMAN	G3N0S9_BOVIN	F1N076_BOVIN
C1R_HUMAN	BiognosysIRT	F1N5M2_BOVIN
HPT_HUMAN	HAX1_HUMAN	F6R4P6_BOVIN
HPTR_HUMAN	MASP2_HUMAN	G3N0S9_BOVIN
FA9_HUMAN	QSOX1_HUMAN	BiognosysIRT
FA10_HUMAN	NCHL1_HUMAN	HAX1_HUMAN
CFAD_HUMAN	PODXL_HUMAN	MASP2_HUMAN
PLMN_HUMAN	NRP1_HUMAN	QSOX1_HUMAN
FA12_HUMAN	APOL1_HUMAN	NCHL1_HUMAN
CFAB_HUMAN	LECT2_HUMAN	PODXL_HUMAN
CAH1_HUMAN	CD5L_HUMAN	NRP1_HUMAN
ANT3_HUMAN	FCG3B_HUMAN	APOL1_HUMAN
A1AT_HUMAN	ICOSL_HUMAN	LECT2_HUMAN
AACT_HUMAN	PGRP1_HUMAN	ACTN4_HUMAN
ANGT_HUMAN	FCN3_HUMAN	CD5L_HUMAN
A2MG_HUMAN	ATRN_HUMAN	H2B1K_HUMAN;H2BFS_HUMAN;H2B1D_HUMAN;H2B1C_HUMAN;H2B2F_HUMAN;H2B1H_HUMAN;H2B1N_HUMAN;H2B1M_HUMAN;H2B1L_HUMAN
CO3_HUMAN	APOM_HUMAN	FCG3B_HUMAN
CO5_HUMAN	ABCA1_HUMAN	ICOSL_HUMAN
CYTC_HUMAN	NDST3_HUMAN;NDST4_HUMAN	PGRP1_HUMAN
KNG1_HUMAN	GSHR_HUMAN	FCN3_HUMAN
IGF2_HUMAN	CERU_HUMAN	ATRN_HUMAN
IGJ_HUMAN	F13A_HUMAN	APOM_HUMAN
KVD33_HUMAN;KV133_HUMAN	THRB_HUMAN	ABCA1_HUMAN
KV139_HUMAN;KVD39_HUMAN	THRB_BOVIN	NDST3_HUMAN;NDST4_HUMAN
KV117_HUMAN	C1R_HUMAN	GSHR_HUMAN
KVD16_HUMAN	HPT_HUMAN	CERU_HUMAN
KV105_HUMAN	HPTR_HUMAN	THRB_HUMAN
KV320_HUMAN	FA9_HUMAN	THRB_BOVIN
LV144_HUMAN	FA10_HUMAN	C1R_HUMAN
LV147_HUMAN	CFAD_HUMAN	HPT_HUMAN
LV151_HUMAN	PLMN_HUMAN	HPTR_HUMAN
LV140_HUMAN	FA12_HUMAN	FA9_HUMAN
LV319_HUMAN	CFAB_HUMAN	FA10_HUMAN
LV325_HUMAN	CTRA_BOVIN	CFAD_HUMAN
LV327_HUMAN	CAH1_HUMAN	PLMN_HUMAN
LV657_HUMAN	AMBP_BOVIN	FA12_HUMAN
HV169_HUMAN	ANT3_HUMAN	CFAB_HUMAN
HV307_HUMAN	A1AT_HUMAN	TRYP_PIG
HV205_HUMAN	AACT_HUMAN	CTRA_BOVIN
PIGR_HUMAN	ANGT_HUMAN	CAH1_HUMAN
IGKC_HUMAN	A2MG_HUMAN	AMBP_BOVIN
IGHG1_HUMAN	CO3_HUMAN	ANT3_HUMAN
IGHG2_HUMAN	CO5_HUMAN	A1AT_HUMAN
IGHG3_HUMAN	TIMP1_HUMAN	AACT_HUMAN
IGHG4_HUMAN	CYTC_HUMAN	ANGT_HUMAN
IGHM_HUMAN	KNG1_HUMAN	A2MG_HUMAN
IGHA1_HUMAN	KNG1_BOVIN	CO3_HUMAN
IGHA2_HUMAN	KNG2_BOVIN	CO5_HUMAN
IGHD_HUMAN	IGF2_HUMAN	TIMP1_HUMAN
HBA_BOVIN	IGJ_HUMAN	CYTC_HUMAN
HBD_HUMAN	KVD33_HUMAN;KV133_HUMAN	CYTA_HUMAN
APOA1_HUMAN	KV139_HUMAN;KVD39_HUMAN	KNG1_HUMAN
APOE_HUMAN	KV117_HUMAN	KNG1_BOVIN
APOA2_HUMAN	KVD16_HUMAN	KNG2_BOVIN
APOC1_HUMAN	KV105_HUMAN	IGF2_HUMAN
APOC2_HUMAN	KV320_HUMAN	IGJ_HUMAN
APOC3_HUMAN	LV144_HUMAN	KVD33_HUMAN;KV133_HUMAN
FIBB_HUMAN	LV147_HUMAN	KV139_HUMAN;KVD39_HUMAN
FIBG_HUMAN	LV151_HUMAN	KV117_HUMAN
SAMP_HUMAN	LV140_HUMAN	KVD16_HUMAN
C1QA_HUMAN	LV214_HUMAN	KV105_HUMAN
C1QB_HUMAN	LV211_HUMAN	KV320_HUMAN
C1QC_HUMAN	LV208_HUMAN	LV144_HUMAN
CO9_HUMAN	LV319_HUMAN	LV147_HUMAN
APOH_HUMAN	LV325_HUMAN	LV151_HUMAN
A2GL_HUMAN	LV327_HUMAN	LV140_HUMAN
FINC_HUMAN	LV657_HUMAN	LV214_HUMAN
RET4_HUMAN	HV169_HUMAN	LV211_HUMAN
LACB_BOVIN	HV146_HUMAN	LV208_HUMAN
AMBP_HUMAN	HV313_HUMAN	LV319_HUMAN
A1AG1_HUMAN	HV307_HUMAN	LV325_HUMAN
FETUA_HUMAN	PIGR_HUMAN	LV327_HUMAN
TTHY_HUMAN	IGKC_HUMAN	LV657_HUMAN
ALBU_HUMAN	IGHG1_HUMAN	HV169_HUMAN
VTDB_HUMAN	IGHG2_HUMAN	HV146_HUMAN
CXCL7_HUMAN	IGHG3_HUMAN	HV313_HUMAN
PLF4_HUMAN	IGHG4_HUMAN	HV307_HUMAN
TFR1_HUMAN	IGHM_HUMAN	HV205_HUMAN
TRFE_HUMAN	IGHA1_HUMAN	PIGR_HUMAN
TRFL_HUMAN	IGHA2_HUMAN	IGKC_HUMAN
HEMO_HUMAN	HBA_BOVIN	IGHG1_HUMAN
ANGI_HUMAN	HBD_HUMAN	IGHG2_HUMAN
FA11_HUMAN	HBBF_BOVIN	IGHG3_HUMAN
KLKB1_HUMAN	APOA1_HUMAN	IGHG4_HUMAN
C4BPA_HUMAN	APOE_HUMAN	IGHM_HUMAN
VTNC_HUMAN	APOA2_HUMAN	IGHA1_HUMAN
CATA_HUMAN	APOC1_HUMAN	IGHA2_HUMAN
FUCO_HUMAN	APOC2_HUMAN	IGHD_HUMAN
PROC_HUMAN	APOC3_HUMAN	HBA_BOVIN
APOB_HUMAN	FIBA_HUMAN	HBD_HUMAN
LCAT_HUMAN	FIBB_HUMAN	HBBF_BOVIN
HRG_HUMAN	FIBG_HUMAN	CO1A1_HUMAN
LV743_HUMAN	SAMP_HUMAN	K1C14_HUMAN
A1BG_HUMAN	C1QA_HUMAN	K2C6A_HUMAN
VWF_HUMAN	C1QB_HUMAN	APOA1_HUMAN
SHBG_HUMAN	C1QC_HUMAN	APOE_HUMAN
KV116_HUMAN	CO9_HUMAN	APOA2_HUMAN
HLAA_HUMAN	APOH_HUMAN	APOC1_HUMAN
H2A1B_HUMAN;H2A1_HUMAN;H2A1D_HUMAN;H2A3_HUMAN;H2A1C_HUMAN;H2A1H_HUMAN;H2A1J_HUMAN;H2AJ_HUMAN	A2GL_HUMAN	APOC2_HUMAN
ALDOB_HUMAN	FINC_HUMAN	APOC3_HUMAN
APOD_HUMAN	RET4_HUMAN	CASB_BOVIN
CFAI_HUMAN	AMBP_HUMAN	FIBA_HUMAN
F13B_HUMAN	A1AG1_HUMAN	FIBB_HUMAN
TETN_HUMAN	FETUA_HUMAN	FIBG_HUMAN
THBG_HUMAN	TTHY_HUMAN	CRP_HUMAN
HEP2_HUMAN	ALBU_HUMAN	SAMP_HUMAN
CHLE_HUMAN	ALBU_BOVIN	C1QA_HUMAN
KV401_HUMAN	VTDB_HUMAN	C1QB_HUMAN
HV434_HUMAN	CXCL7_HUMAN	C1QC_HUMAN
GELS_HUMAN	PLF4_HUMAN	CO9_HUMAN
CO2_HUMAN	TRFE_HUMAN	APOH_HUMAN
APOA4_HUMAN	TRFL_HUMAN	A2GL_HUMAN
PROS_HUMAN	HEMO_HUMAN	FINC_HUMAN
CSF1R_HUMAN	FA11_HUMAN	RET4_HUMAN
CATD_HUMAN	KLKB1_HUMAN	AMBP_HUMAN
CO8A_HUMAN	C4BPA_HUMAN	A1AG1_HUMAN
CO8B_HUMAN	VTNC_HUMAN	FETUA_HUMAN
GP1BA_HUMAN	CATA_HUMAN	TTHY_HUMAN
CO8G_HUMAN	FUCO_HUMAN	ALBU_HUMAN
TBB5_HUMAN	PROC_HUMAN	ALBU_BOVIN
TRY1_HUMAN	APOB_HUMAN	VTDB_HUMAN
TSP1_HUMAN	LCAT_HUMAN	CXCL7_HUMAN
CBG_HUMAN	HRG_HUMAN	PLF4_HUMAN
APOA_HUMAN	LV743_HUMAN	TRFE_HUMAN
CD14_HUMAN	A1BG_HUMAN	TRFL_HUMAN
CFAH_HUMAN	VWF_HUMAN	HEMO_HUMAN
FCG3A_HUMAN	SHBG_HUMAN	FA11_HUMAN
A2AP_HUMAN	KV116_HUMAN	KLKB1_HUMAN
C1S_HUMAN	ALDOB_HUMAN	C4BPA_HUMAN
CO4A_HUMAN	APOD_HUMAN	VTNC_HUMAN
CO4B_HUMAN	CFAI_HUMAN	PROC_HUMAN
ZN853_HUMAN	F13B_HUMAN	ALDOA_HUMAN
SAA1_HUMAN	ICAM1_HUMAN	APOB_HUMAN
IGLC2_HUMAN	TETN_HUMAN	LCAT_HUMAN
HV108_HUMAN	THBG_HUMAN	HRG_HUMAN
CALM1_HUMAN;CALM2_HUMAN;CALM3_HUMAN	HEP2_HUMAN	LV743_HUMAN
H14_HUMAN	CHLE_HUMAN	A1BG_HUMAN
CO7_HUMAN	KV230_HUMAN	K2C6B_HUMAN
CLUS_HUMAN	KV401_HUMAN	K2C1_HUMAN
MBL2_HUMAN	GELS_HUMAN	VWF_HUMAN
CETP_HUMAN	CO2_HUMAN	SHBG_HUMAN
FA5_HUMAN	APOA4_HUMAN	G3P_HUMAN
LAMP2_HUMAN	PLMN_BOVIN	KV116_HUMAN
ICAM2_HUMAN	PROS_HUMAN	H2A1B_HUMAN;H2A1_HUMAN;H2A1D_HUMAN;H2A3_HUMAN;H2A1C_HUMAN;H2A1H_HUMAN;H2A1J_HUMAN;H2AJ_HUMAN
CO6_HUMAN	CSF1R_HUMAN	IGF1_HUMAN
PLSL_HUMAN	CATD_HUMAN	ALDOB_HUMAN
KAP2_HUMAN	CO8A_HUMAN	A4_HUMAN
LYAM1_HUMAN	CO8B_HUMAN	APOD_HUMAN
CBPN_HUMAN	GP1BA_HUMAN	IC1_HUMAN
B4GT1_HUMAN	CO8G_HUMAN	CFAI_HUMAN
EZRI_HUMAN	TRY1_HUMAN	F13B_HUMAN
HIS3_HUMAN	TSP1_HUMAN	ICAM1_HUMAN
IGLL1_HUMAN	CBG_HUMAN	TETN_HUMAN
CD44_HUMAN	SODE_HUMAN	THBG_HUMAN
FAAA_HUMAN	APOA_HUMAN	HEP2_HUMAN
IBP3_HUMAN	CD14_HUMAN	CHLE_HUMAN
IBP2_HUMAN	CFAH_HUMAN	KV230_HUMAN
LBP_HUMAN	FCG3A_HUMAN	KV401_HUMAN
VCAM1_HUMAN	A2AP_HUMAN	HV434_HUMAN
A1AG2_HUMAN	FA7_HUMAN	GELS_HUMAN
ITIH2_HUMAN	DOPO_HUMAN	CO2_HUMAN
ITIH1_HUMAN	SPRC_HUMAN	APOA4_HUMAN
PZP_HUMAN	DLDH_HUMAN	PLMN_BOVIN
C4BPB_HUMAN	C1S_HUMAN	LDHB_HUMAN
GPX3_HUMAN	CO4A_HUMAN	PROS_HUMAN
IBP4_HUMAN	CO4B_HUMAN	CSF1R_HUMAN
CPN2_HUMAN	ZN853_HUMAN	CATD_HUMAN
FBLN1_HUMAN	SAA1_HUMAN	CO8A_HUMAN
PTPRG_HUMAN	SAA2_HUMAN	CO8B_HUMAN
ZA2G_HUMAN	IGLC2_HUMAN	GP1BA_HUMAN
HGFL_HUMAN	IGLC3_HUMAN	CO8G_HUMAN
PON1_HUMAN	HV108_HUMAN	TBB5_HUMAN
PROP_HUMAN	HV383_HUMAN	TRY1_HUMAN
KAIN_HUMAN	PPGB_HUMAN	SAP_HUMAN
HXA11_HUMAN	CO7_HUMAN	CATB_HUMAN
PRDX2_HUMAN	CLUS_HUMAN	TSP1_HUMAN
MA1A1_HUMAN	MBL2_HUMAN	RNAS1_HUMAN
SAA4_HUMAN	CETP_HUMAN	CBG_HUMAN
ALS_HUMAN	CO6A1_HUMAN	SODE_HUMAN
PEDF_HUMAN	FA5_HUMAN	MGP_HUMAN
FHR2_HUMAN	FCG2A_HUMAN	APOA_HUMAN
MUC18_HUMAN	FETUA_BOVIN	CD14_HUMAN
BTD_HUMAN	PEPD_HUMAN	CFAH_HUMAN
AFAM_HUMAN	NCAM1_HUMAN	FCG3A_HUMAN
CAPZB_HUMAN	ICAM2_HUMAN	A2AP_HUMAN
MASP1_HUMAN	CO6_HUMAN	FA7_HUMAN
COMP_HUMAN	PLSL_HUMAN	K1C16_HUMAN
SEPP1_HUMAN	KAP2_HUMAN	DOPO_HUMAN
CAMP_HUMAN	LYAM1_HUMAN	SPRC_HUMAN
LUM_HUMAN	CBPN_HUMAN	DLDH_HUMAN
RPAB3_HUMAN	B4GT1_HUMAN	C1S_HUMAN
CRIS3_HUMAN	EZRI_HUMAN	CO4A_HUMAN
APOC4_HUMAN	APOA1_BOVIN	CO4B_HUMAN
PLTP_HUMAN	HIS3_HUMAN	ZN853_HUMAN
INHBC_HUMAN	IGLL1_HUMAN	SAA1_HUMAN
CAD13_HUMAN	CD44_HUMAN	SAA2_HUMAN
DEF1_HUMAN;DEF3_HUMAN	FAAA_HUMAN	IGLC2_HUMAN
ACTB_HUMAN	APOH_BOVIN	IGLC3_HUMAN
LYSC_HUMAN	IBP3_HUMAN	HV108_HUMAN
B2MG_HUMAN	IBP2_HUMAN	HV383_HUMAN
DAD1_HUMAN	LBP_HUMAN	H14_HUMAN
ACTG_HUMAN	VCAM1_HUMAN	THIO_HUMAN
TBA1B_HUMAN	A1AG2_HUMAN	CO7_HUMAN
TBB4B_HUMAN	ITIH2_HUMAN	CLUS_HUMAN
HBB_HUMAN	ITIH1_HUMAN	BIP_HUMAN
HBG1_HUMAN;HBG2_HUMAN	ANXA7_HUMAN	MBL2_HUMAN
HBA_HUMAN	PZP_HUMAN	CETP_HUMAN
RPP38_HUMAN	C4BPB_HUMAN	UTER_HUMAN
PHLD_HUMAN	GPX3_HUMAN	FA5_HUMAN
NGAL_HUMAN	IBP4_HUMAN	FCG2A_HUMAN
BASP1_HUMAN	CPN2_HUMAN	FETUA_BOVIN
LV321_HUMAN	PROZ_HUMAN	LAMP2_HUMAN
RT35_HUMAN	HV102_HUMAN	NCAM1_HUMAN
FHR3_HUMAN	FBLN1_HUMAN	ICAM2_HUMAN
FHR1_HUMAN	PTPRG_HUMAN	K1C10_HUMAN
HGFA_HUMAN	ZA2G_HUMAN	K2C5_HUMAN
ITIH3_HUMAN	HGFL_HUMAN	CO6_HUMAN
LG3BP_HUMAN	PON1_HUMAN	PLSL_HUMAN
BST1_HUMAN	PROP_HUMAN	KAP2_HUMAN
FBLN3_HUMAN	A2AP_BOVIN	LYAM1_HUMAN
CNTN1_HUMAN	KAIN_HUMAN	PLAK_HUMAN
ELAV2_HUMAN	HXA11_HUMAN	PVR_HUMAN
SPP24_HUMAN	PRDX2_HUMAN	CBPN_HUMAN
PDZ1I_HUMAN	CADH5_HUMAN	B4GT1_HUMAN
APOF_HUMAN	MA1A1_HUMAN	APOA1_BOVIN
TBB2A_HUMAN	A1AT_BOVIN	HIS3_HUMAN
CEAM7_HUMAN	SAA4_HUMAN	IGLL1_HUMAN
HABP2_HUMAN	ALS_HUMAN	CD44_HUMAN
ITIH4_HUMAN	PEDF_HUMAN	FAAA_HUMAN
BLTP2_HUMAN	FHR2_HUMAN	APOH_BOVIN
PCOC1_HUMAN	NUP62_HUMAN	IBP3_HUMAN
FCN2_HUMAN	PTGDS_HUMAN	IBP2_HUMAN
BGH3_HUMAN	ANT3_BOVIN	VINC_HUMAN
ADIPO_HUMAN	BTD_HUMAN	LBP_HUMAN
ECM1_HUMAN	RANG_HUMAN	CADH2_HUMAN
H2A2C_HUMAN;H2A2A_HUMAN	AFAM_HUMAN	VCAM1_HUMAN
Q1RMN8_BOVIN	MASP1_HUMAN	A1AG2_HUMAN
Q28194_BOVIN	COMP_HUMAN	ITIH2_HUMAN
CO7_BOVIN	SEPP1_HUMAN	ITIH1_HUMAN
Q3KUS7_BOVIN	CAMP_HUMAN	ANXA7_HUMAN
ZMYM1_HUMAN	LUM_HUMAN	C4BPB_HUMAN
VASN_HUMAN	CRIS3_HUMAN	FILA_HUMAN
RETST_HUMAN	APOC4_HUMAN	TENX_HUMAN
PI16_HUMAN	PLTP_HUMAN	GPX3_HUMAN
ATL4_HUMAN	INHBC_HUMAN	SAV_STRAV
ATS13_HUMAN	CAD13_HUMAN	IBP4_HUMAN
SPT6H_HUMAN	DEF1_HUMAN;DEF3_HUMAN	CPN2_HUMAN
DDX46_HUMAN	ACTB_HUMAN	PROZ_HUMAN
CHST9_HUMAN	LYSC_HUMAN	HV102_HUMAN
ZSWM9_HUMAN	B2MG_HUMAN	FBLN1_HUMAN
LMTK2_HUMAN	ACTG_HUMAN	PTPRG_HUMAN
FANCM_HUMAN	TBA1B_HUMAN	IBP5_HUMAN
GOLM1_HUMAN	TBB4B_HUMAN	ZA2G_HUMAN
FUBP2_HUMAN	HBB_HUMAN	S10A4_HUMAN
PRG4_HUMAN	HBA_HUMAN	HGFL_HUMAN
E2F7_HUMAN	RPP38_HUMAN	PON1_HUMAN
R51A1_HUMAN	PHLD_HUMAN	1433T_HUMAN
CBPB2_HUMAN	NGAL_HUMAN	PROP_HUMAN
CNDP1_HUMAN	BASP1_HUMAN	GRN_HUMAN
PGRP2_HUMAN	LV321_HUMAN	A2AP_BOVIN
PEBP4_HUMAN	APOA2_BOVIN	IMPA1_HUMAN
RARR2_HUMAN	PGBM_HUMAN	KAIN_HUMAN
INP5K_HUMAN	FABP5_HUMAN	HXA11_HUMAN
COL11_HUMAN	FHR3_HUMAN	PRDX2_HUMAN
FHR5_HUMAN	FHR1_HUMAN	ICAM3_HUMAN
CARD9_HUMAN	HGFA_HUMAN	CADH5_HUMAN
GAPR1_HUMAN	ITIH3_HUMAN	ERD22_HUMAN
C1QR1_HUMAN	DDR1_HUMAN	A1AT_BOVIN
CRAC1_HUMAN	LG3BP_HUMAN	K1C9_HUMAN
C1RL_HUMAN	BST1_HUMAN	SAA4_HUMAN
MARCO_HUMAN	FBLN3_HUMAN	ALS_HUMAN
FETUB_HUMAN	CNTN1_HUMAN	K22E_HUMAN
ZPI_HUMAN	ELAV2_HUMAN	PEDF_HUMAN
ITM2B_HUMAN	SPP24_HUMAN	FHR2_HUMAN
FCGBP_HUMAN	PDZ1I_HUMAN	NUP62_HUMAN
	CD166_HUMAN	PTGDS_HUMAN
	APOF_HUMAN	ANT3_BOVIN
	TBB2A_HUMAN	MUC18_HUMAN
	CEAM7_HUMAN	BTD_HUMAN
	DAG1_HUMAN	AFAM_HUMAN
	DSG2_HUMAN	GLYG_HUMAN
	HABP2_HUMAN	CAPZB_HUMAN
	ITIH4_HUMAN	MASP1_HUMAN
	BLTP2_HUMAN	COMP_HUMAN
	CUL7_HUMAN	SEPP1_HUMAN
	PCOC1_HUMAN	CAMP_HUMAN
	PON3_HUMAN	LUM_HUMAN
	ZMY11_HUMAN	CRIS3_HUMAN
	FCN2_HUMAN	APOC4_HUMAN
	TAF1A_HUMAN	PLTP_HUMAN
	BGH3_HUMAN	INHBC_HUMAN
	ECM1_HUMAN	CAD13_HUMAN
	Q1RMN8_BOVIN	DEF1_HUMAN;DEF3_HUMAN
	CFAH_BOVIN	ACTB_HUMAN
	Q28194_BOVIN	LYSC_HUMAN
	TRFE_BOVIN	B2MG_HUMAN
	CO7_BOVIN	RS27A_HUMAN
	Q2KIF2_BOVIN	1433Z_HUMAN
	A1BG_BOVIN	ACTG_HUMAN
	CO3_BOVIN	TBA1B_HUMAN
	APOA4_BOVIN	TBB4B_HUMAN
	Q3KUS7_BOVIN	HBB_HUMAN
	Q3SZH5_BOVIN	HBA_HUMAN
	A1AG_BOVIN	RPP38_HUMAN
	HEMO_BOVIN	GTF2I_HUMAN
	ITIH4_BOVIN	PHLD_HUMAN
	ADIPO_BOVIN	NGAL_HUMAN
	Q3ZBS7_BOVIN	BASP1_HUMAN
	PKDCC_HUMAN	LV321_HUMAN
	FETUB_BOVIN	DCD_HUMAN
	VASN_HUMAN	APOA2_BOVIN
	RETST_HUMAN	PGBM_HUMAN
	PXDC2_HUMAN	FABP5_HUMAN
	PI16_HUMAN	FHR3_HUMAN
	ATL4_HUMAN	FHR1_HUMAN
	ATS13_HUMAN	HGFA_HUMAN
	SPT6H_HUMAN	ITIH3_HUMAN
	CHST9_HUMAN	PRDX1_HUMAN
	A2MG_BOVIN	LG3BP_HUMAN
	CATAC_HUMAN	BST1_HUMAN
	C163A_HUMAN	FBLN3_HUMAN
	ZSWM9_HUMAN	FSTL1_HUMAN
	LMTK2_HUMAN	SPP24_HUMAN
	AMOL1_HUMAN;AMOL2_HUMAN	PDZ1I_HUMAN
	FANCM_HUMAN	CD166_HUMAN
	AGRF5_HUMAN	APOF_HUMAN
	PCSK9_HUMAN	TBB2A_HUMAN
	TM190_HUMAN	C1D_HUMAN
	FHR4_HUMAN	CEAM7_HUMAN
	GGH_HUMAN	DAG1_HUMAN
	PRG4_HUMAN	DSG2_HUMAN
	E2F7_HUMAN	SPRL1_HUMAN
	CC126_HUMAN	HABP2_HUMAN
	CBPB2_HUMAN	ITIH4_HUMAN
	CNDP1_HUMAN	BLTP2_HUMAN
	PGRP2_HUMAN	PCOC1_HUMAN
	PANX1_HUMAN	ZMY11_HUMAN
	PEBP4_HUMAN	FCN2_HUMAN
	NOE1_HUMAN	TAF1A_HUMAN
	RARR2_HUMAN	BGH3_HUMAN
	INP5K_HUMAN	CYTM_HUMAN
	RPAP1_HUMAN	ADIPO_HUMAN
	COL11_HUMAN	IBP7_HUMAN
	FHR5_HUMAN	ECM1_HUMAN
	CARD9_HUMAN	Q1RMN8_BOVIN
	SH3L3_HUMAN	TRFE_BOVIN
	GAPR1_HUMAN	CO7_BOVIN
	MMRN2_HUMAN	Q2KIF2_BOVIN
	APMAP_HUMAN	A1BG_BOVIN
	IPSP_BOVIN	CO3_BOVIN
	IL1AP_HUMAN	APOA4_BOVIN
	C1QR1_HUMAN	Q3KUS7_BOVIN
	CRAC1_HUMAN	Q3SZH5_BOVIN
	BIRC6_HUMAN	A1AG_BOVIN
	GEMI8_HUMAN	HEMO_BOVIN
	C1RL_HUMAN	ITIH4_BOVIN
	SPA31_BOVIN	ADIPO_BOVIN
	TFP11_HUMAN	Q3ZBS7_BOVIN
	KLOT_HUMAN	PAR14_HUMAN
	MARCO_HUMAN	PKDCC_HUMAN
	MIOX_HUMAN	FETUB_BOVIN
	FETUB_HUMAN	VASN_HUMAN
	ZPI_HUMAN	RETST_HUMAN
	RAB21_HUMAN	MZT2B_HUMAN
	NOTC3_HUMAN	SBSN_HUMAN
	SIA10_HUMAN	PXDC2_HUMAN
	LYVE1_HUMAN	PI16_HUMAN
	FCGBP_HUMAN	ATL4_HUMAN
		ATS13_HUMAN
		SPT6H_HUMAN
		DDX46_HUMAN
		CHST9_HUMAN
		A2MG_BOVIN
		ATL2_HUMAN
		OAF_HUMAN
		C163A_HUMAN
		ZSWM9_HUMAN
		HORN_HUMAN
		RB6I2_HUMAN
		LMTK2_HUMAN
		AMOL1_HUMAN;AMOL2_HUMAN
		FANCM_HUMAN
		AGRF5_HUMAN
		K2C78_HUMAN
		GOLM1_HUMAN
		PCSK9_HUMAN
		SERB1_HUMAN
		CE192_HUMAN
		WFD12_HUMAN
		TM190_HUMAN
		FHR4_HUMAN
		GGH_HUMAN
		FUBP2_HUMAN
		PRG4_HUMAN
		CC126_HUMAN
		CBPB2_HUMAN
		CNDP1_HUMAN
		PGRP2_HUMAN
		PANX1_HUMAN
		NOE1_HUMAN
		RARR2_HUMAN
		MENT_HUMAN
		COL11_HUMAN
		FHR5_HUMAN
		CARD9_HUMAN
		SH3L3_HUMAN
		GAPR1_HUMAN
		MMRN2_HUMAN
		APMAP_HUMAN
		IPSP_BOVIN
		IL1AP_HUMAN
		C1QR1_HUMAN
		CRAC1_HUMAN
		KRT84_HUMAN
		GEMI8_HUMAN
		C1RL_HUMAN
		CALL5_HUMAN
		SPA31_BOVIN
		TFP11_HUMAN
		MARCO_HUMAN
		MIOX_HUMAN
		FETUB_HUMAN
		ZPI_HUMAN
		RAB21_HUMAN
		NOTC3_HUMAN
		SIA10_HUMAN
		LYVE1_HUMAN
		FCGBP_HUMAN
