# Supplementary material
Source: Royal Society of Chemistry journal article supplement (doi:10.1039/d6ay00720a)
Supplement: d6ay00720a2.pdf [file d6ay00720a2.pdf]

## **Supporting Information**

### **Application of Open-Tube Immobilized Enzyme Microreactor Constructed by Magnetic Macro- Porous Silica Beads in Proteomic Analysis**

Yaqi Yin<sup>1</sup>, Xinyue Nie, Lingyi Zhang\*, Weibing Zhang

Shanghai Key Laboratory of Functional Materials Chemistry, School of Chemistry & Molecular  
Engineering, East China University of Science and Technology, Shanghai 200237, China.

## Table of Content

|                                                                |   |
|----------------------------------------------------------------|---|
| Supporting Information.....                                    | 1 |
| Table of Content .....                                         | 2 |
| Section 1 Experimental Procedures .....                        | 3 |
| 1.1 Determination of protein concentration.....                | 3 |
| 1.2 Database search.....                                       | 3 |
| 1.3 Total immobilized enzyme amount inside the capillary ..... | 3 |
| Section 2 Supplementary Figures and Tables .....               | 5 |

## Section 1 Experimental Procedures

### 1.1 Determination of protein concentration

Protein concentration was determined using the BCA assay. Briefly, different volumes (1, 2, 4, 8, 12, 16, and 20  $\mu\text{L}$ ) of standard protein solutions were added to a 96-well plate, and the total volume was adjusted to 20  $\mu\text{L}$  with  $\text{NH}_4\text{HCO}_3$  buffer. Then, 200  $\mu\text{L}$  of BCA working reagent was added to each well, and the plate was incubated at  $37^\circ\text{C}$  for 30 min. The absorbance at 562 nm was measured using a microplate reader (SR-3518A), and a standard curve of absorbance versus protein concentration was established. The protein concentration of the samples was determined based on the measured absorbance, and each sample was measured in triplicate.

### 1.2 Database search

Raw Data of DIA were processed and analyzed by Spectronaut 19 (Biognosys AG, Switzerland) with default settings. The database was Homo\_Sapiens (version 2024, 20608 entries) which downloaded from uniprot. Trypsin was the digestion enzyme and specific was the digest type. Carbamidomethyl on cysteine was specified as the fixed modification. Oxidation on methionine, Acetyl on protein N-term were specified as the variable modifications. Retention time prediction type was set to dynamic iRT. Data extraction was determined by Spectronaut based on the extensive mass calibration. Spectronaut will determine the ideal extraction window dynamically depending on iRT calibration and gradient stability. Qvalue (FDR) cutoff on precursor level was 1%, peptide level was 1% and protein level was 1%. Decoy generation was set to mutated which similar to scrambled but will only apply a random number of AA position swamps (min=2, max=length/2). Normalization strategy was set to local normalization. Peptides which passed the 1% Qvalue cutoff were used to calculate the major group quantities with MaxLFQ method.

### 1.3 Total immobilized enzyme amount inside the capillary

The enzyme immobilization amount inside the capillary was calculated according to the following formula:

$$m_e = \frac{1}{4} \Pi d_i^2 L \rho q_i$$

Where  $m_e$  ( $\mu\text{g}$ ) is the enzyme immobilization amount inside the capillary;  $d_i$  ( $\mu\text{m}$ ) is the capillary

inner diameter (75  $\mu\text{m}$  in this work);  $L$  (cm) is the effective coating length of  $\text{SiO}_2@\text{Fe}_3\text{O}_4$ -nIMER;  $\rho$  ( $\text{g}/\text{cm}^3$ ) is the density of  $\text{SiO}_2@\text{Fe}_3\text{O}_4$ , the bulk density ( $0.5126 \text{ g}/\text{cm}^3$ ) acquired from mercury intrusion porosimetry (MIP) was taken as the material density in the calculation;  $q_i$  ( $\mu\text{g}/\text{mg}$ ) is the amount of immobilized enzyme per unit mass of carrier;

## Section 2 Supplementary Figures and Tables

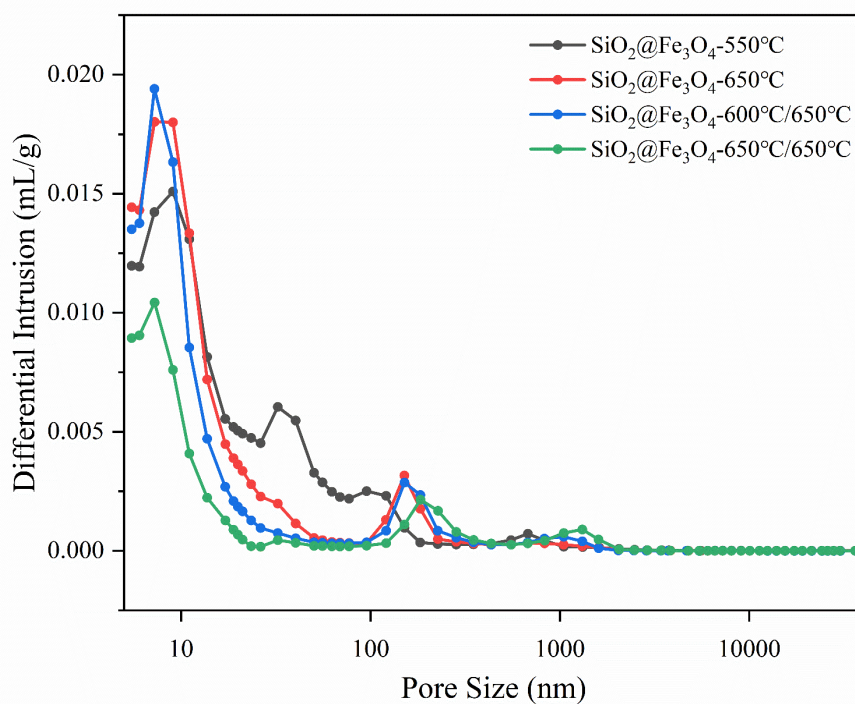

Figure S-1. The pore size distribution of  $\text{SiO}_2@Fe_3O_4$ -550°C,  $\text{SiO}_2@Fe_3O_4$ -650°C,  $\text{SiO}_2@Fe_3O_4$ -600°C/650°C and  $\text{SiO}_2@Fe_3O_4$ -650°C/650°C measured by MIP.

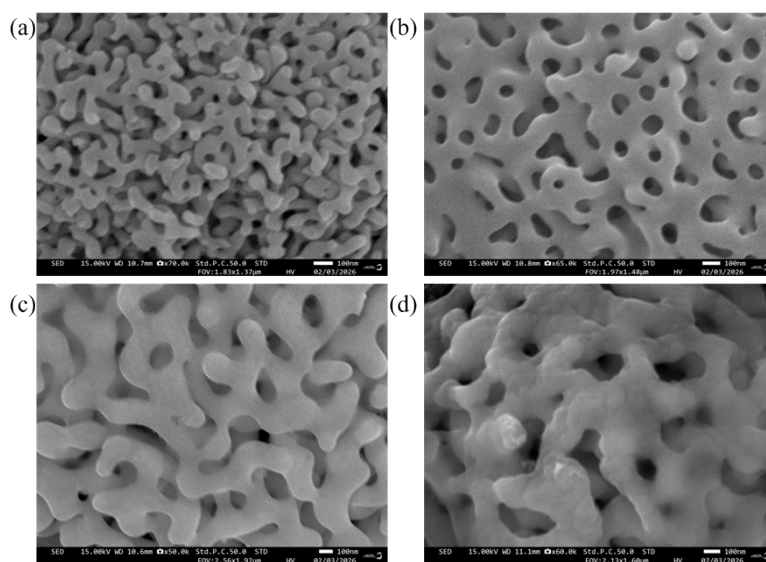

Figure S-2. SEM images of macro-porous silica materials synthesized at 550°C (a), 650°C (b), 600°C/650°C (c) and 650°C/650°C (d) calcination temperature.

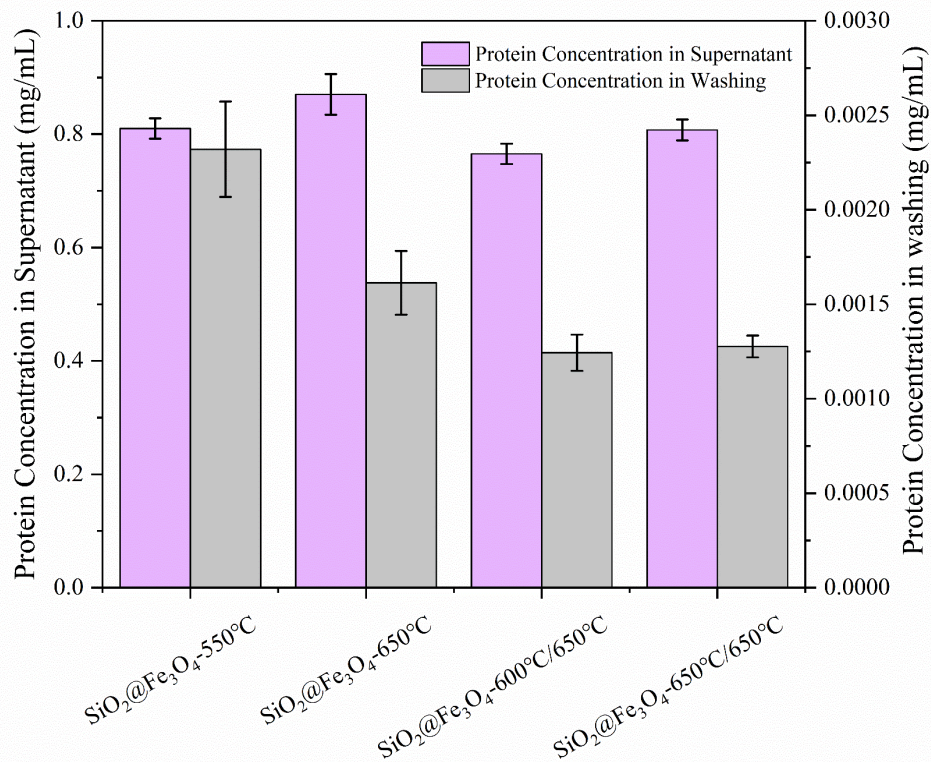

Figure S-3. protein concentration in supernatant and washing solution of SiO<sub>2</sub>@Fe<sub>3</sub>O<sub>4</sub>-550°C, SiO<sub>2</sub>@Fe<sub>3</sub>O<sub>4</sub>-650°C, SiO<sub>2</sub>@Fe<sub>3</sub>O<sub>4</sub>-600°C/650°C and SiO<sub>2</sub>@Fe<sub>3</sub>O<sub>4</sub>-650°C/650°C carriers.

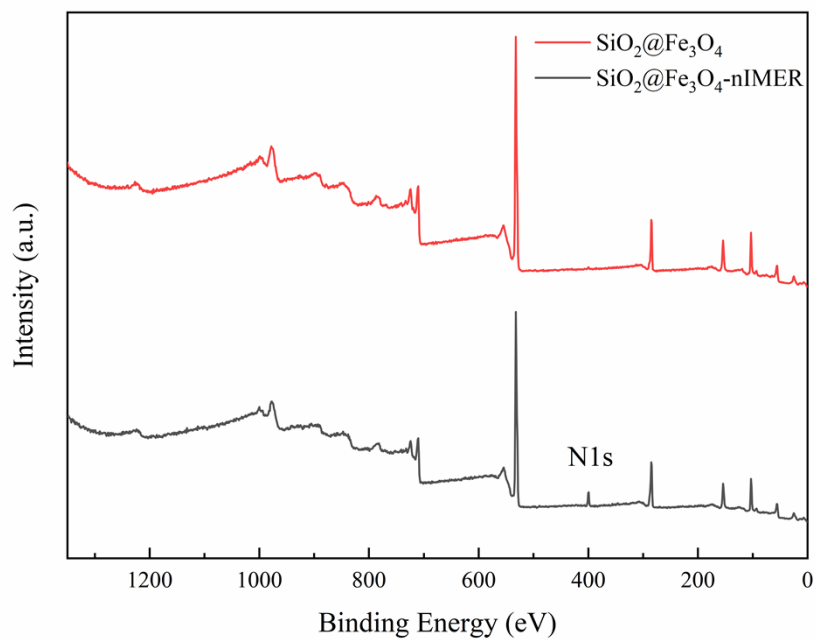

Figure S-4. XPS survey spectrum of SiO<sub>2</sub>@Fe<sub>3</sub>O<sub>4</sub> and SiO<sub>2</sub>@Fe<sub>3</sub>O<sub>4</sub>-nIMER.

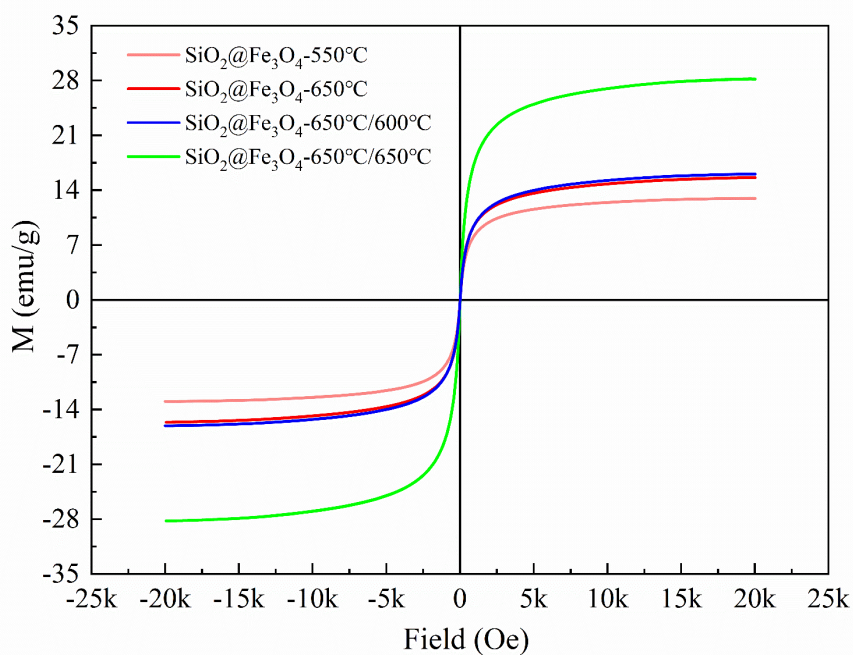

Figure S-5. The hysteresis loop of SiO<sub>2</sub>@Fe<sub>3</sub>O<sub>4</sub>-550°C, SiO<sub>2</sub>@Fe<sub>3</sub>O<sub>4</sub>-650°C, SiO<sub>2</sub>@Fe<sub>3</sub>O<sub>4</sub>-600°C/650°C and SiO<sub>2</sub>@Fe<sub>3</sub>O<sub>4</sub>-650°C/650°C carriers.

Table S-1. Influence of Protein Concentration on Enzymatic digestion efficiency.

| Total protein concentration (mg/mL) | 1   | 0.1 | 0.01 | 0.001 | 0.0001 |
|-------------------------------------|-----|-----|------|-------|--------|
| BSA                                 |     |     |      |       |        |
| Sequence Coverage                   | 90% | 76% | 80%  | 78%   | 74%    |
| Peptides matched                    | 139 | 64  | 82   | 80    | 73     |
| Cytochrome C                        |     |     |      |       |        |
| Sequence Coverage                   | 97% | 71% | 83%  | 88%   | 94%    |
| Peptides matched                    | 32  | 20  | 18   | 18    | 21     |

Digestion conditions: effective coating length: 5.4 cm; Flow rate: 10 μL/min; 37°C.
